# Supplementary material
Source: PubMed Central journal article supplement (PMC8635274)
Supplement: NIHMS1754420-supplement-Supplemental_figures__tables_and_material.pdf [file NIHMS1754420-supplement-Supplemental_figures__tables_and_material.pdf]

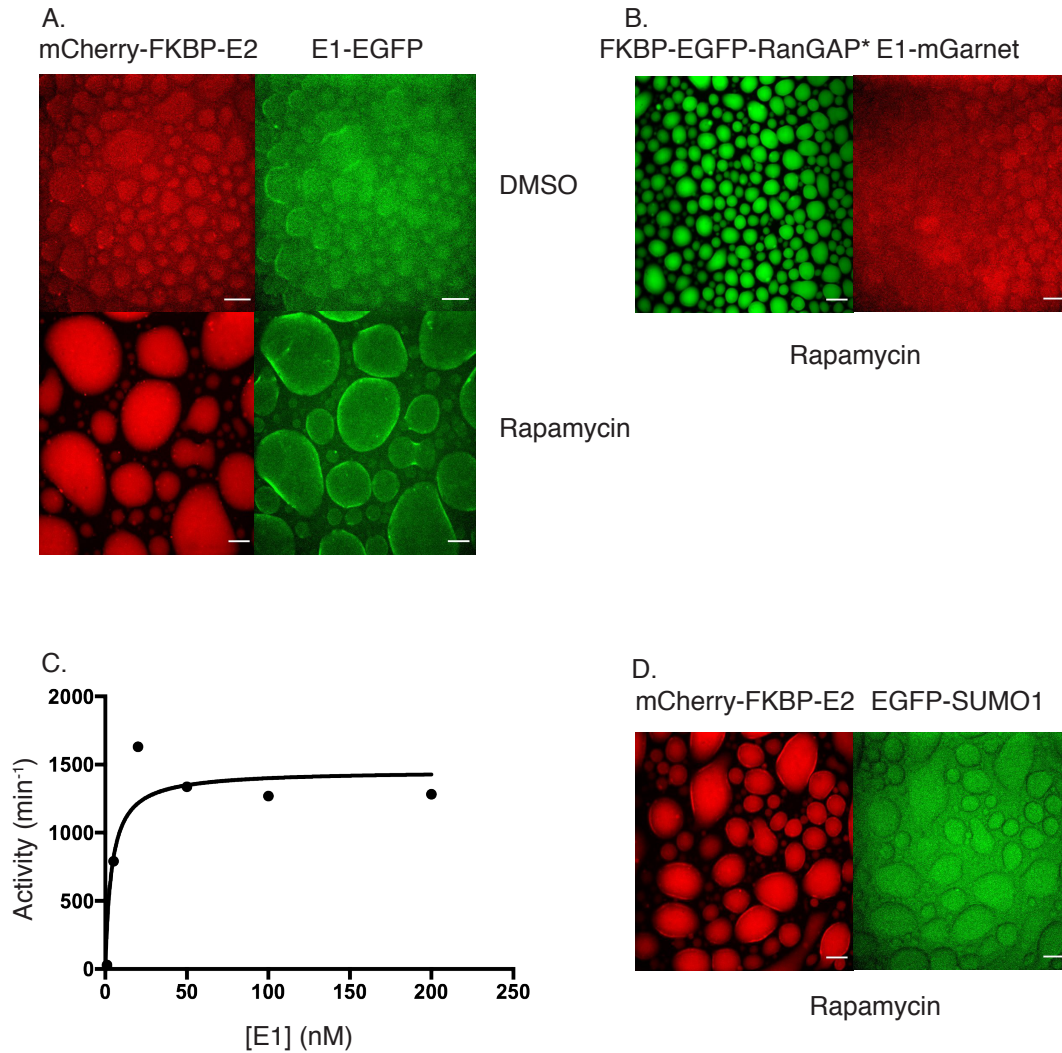

Figure S1

**Supplementary Figure 1. E2-Mediated recruitment of E1, and no recruitment of SUMO.**

(A) Confocal fluorescence microscopy images of mCherry-FKBP-E2 (red) and E1-EGFP (green) in the presence of FRB-polySH3<sub>3</sub>-polyPRM<sub>5</sub> condensates with DMSO (top row) and rapamycin (bottom row). These images are representative of 3 independent experiments. Scale bar is 50 $\mu\text{m}$ .

(B) Confocal fluorescence microscopy images of FKBP-EGFP-substrate (green) and E1-mGarnet (red) in the presence of FRB-polySH3<sub>3</sub>-polyPRM<sub>5</sub> condensates and rapamycin. These images are representative of 4 independent experiments. Scale bar is 50 $\mu\text{m}$ .

(C) Rate curve depicting SUMOylation of RanGAP\* as a function of E1 concentration. Apparent E1  $K_M$  is approximately 5 nM with no significant increase in rate above 50 nM.

(D) Confocal fluorescence microscopy images of mCherry-FKBP-E2 (red) and EGFP-SUMO1 (green) in the presence of FRB-polySH3<sub>3</sub>-polyPRM<sub>5</sub> condensates and rapamycin. These images are representative of 3 independent experiments. Scale bar is 50 $\mu\text{m}$ . All figure panels have associated raw data.

A.

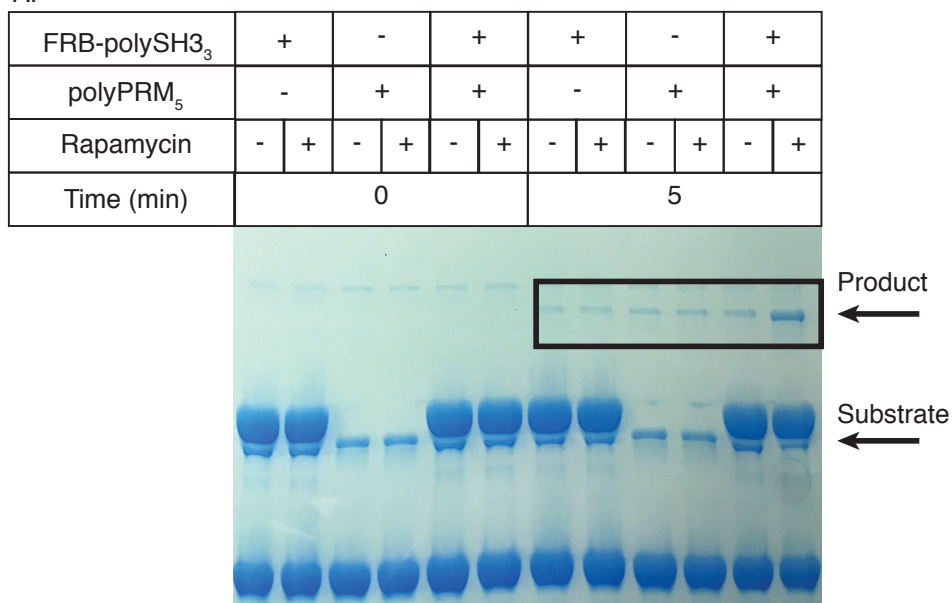

B.

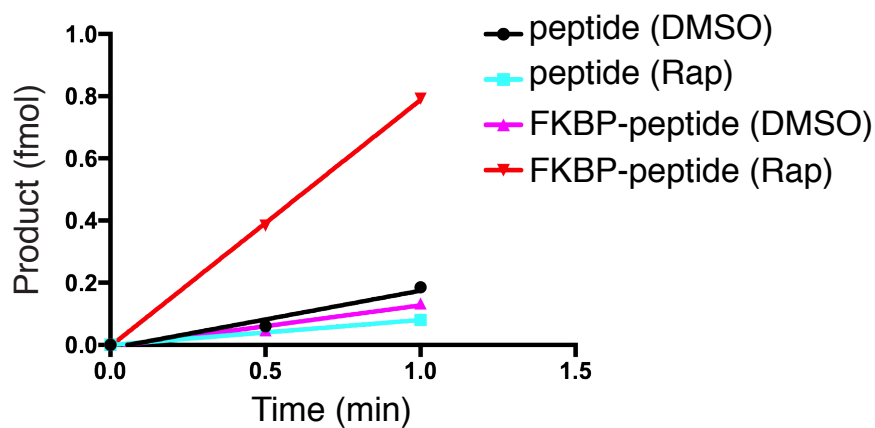

Figure S2

**Supplementary Figure 2. Rate enhancement requires both scaffolds to be present and both E2 and substrate to be tethered to FRB-polySH3<sub>3</sub>.**

(A) SDS-PAGE gel showing the production of SUMOylated substrate over time in the presence of FRB-polySH3<sub>3</sub>, polyPRM<sub>5</sub> or both, with and without rapamycin. B) Plot of Figure 2F depicting the simultaneous SUMOylation rates of peptide and FKBP-peptide when neither are recruited (DMSO) or both are recruited (Rap). All figure panels have associated raw data.

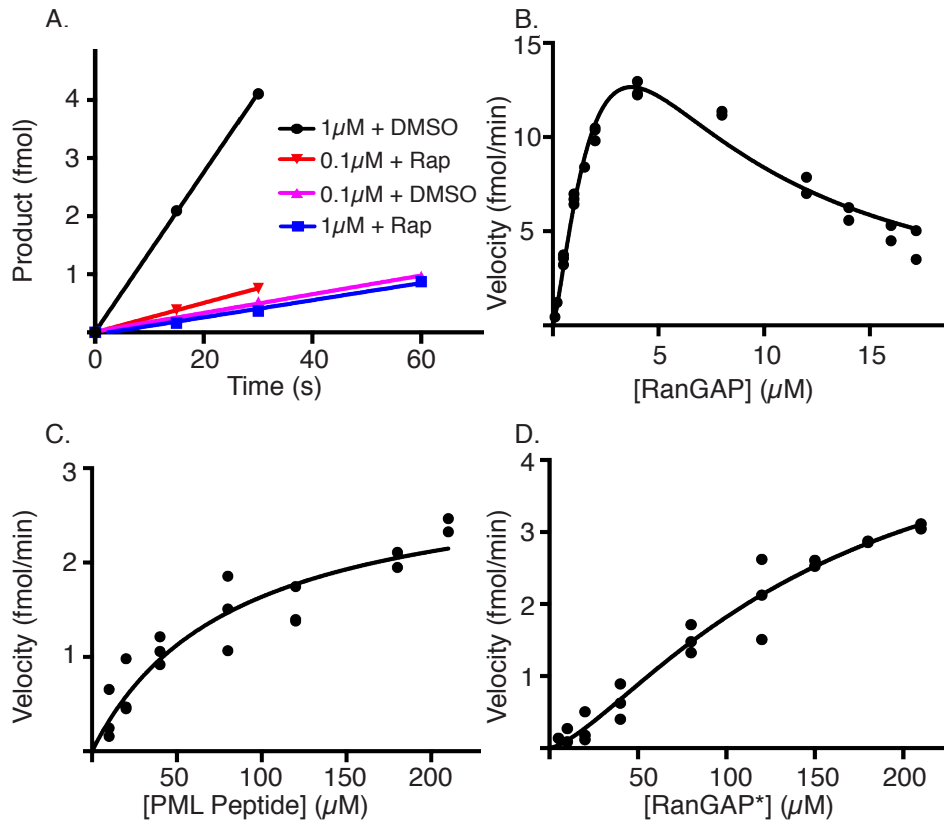

Figure S3

**Supplementary Figure 3. SUMOylation of RanGAP, PML peptide and RanGAP\* substrates.**

(A) SUMOylation rate over time of RanGAP in the presence of FRB-polySH<sub>3</sub>-polyPRM<sub>5</sub> condensates at two different concentrations (1 and 0.1 μM) with and without rapamycin. 1 μM + DMSO (black circles), 1 μM + Rap (blue squares), 0.1 μM + DMSO (magenta triangles), and 0.1 μM + Rap (red inverted triangles). (B)-(D) SUMOylation velocity as a function of substrate concentration for RanGAP (B), PML peptide substrate (C), and RanGAP\* mutant (D). RanGAP fit to substrate inhibition, while PML peptide and RanGAP\* mutant fit to standard Michaelis-Menten. Each symbol represents the mean and standard deviation from n=3 (<150uM) and n=2 (≥150uM) independent experiments. Points without errors bars have standard deviations too small to show.

All figure panels have associated raw data.

A.

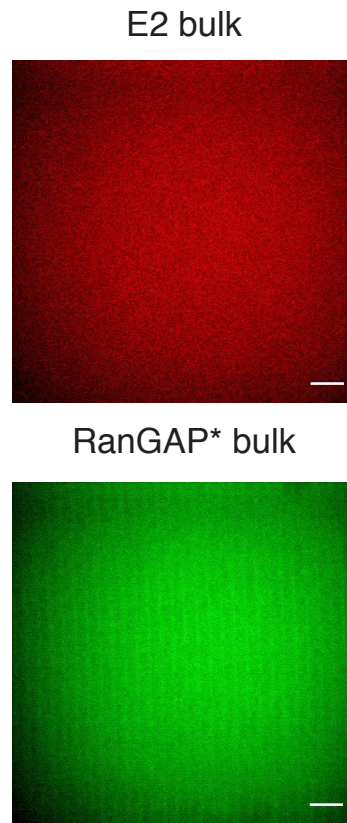

Figure S4

**Supplementary Figure 4. Quantitative images of bulk solution after centrifugation.**

A) Representative confocal fluorescence microscopy images of the bulk solution after clarification by centrifugation. Top row shows mCherry-FKBP-E2, bottom row shows FKBP-EGFP-RanGAP\*. These images are representative of 4 independent experiments. Scale bar is 50 $\mu$ m.

Figure has associated raw data.



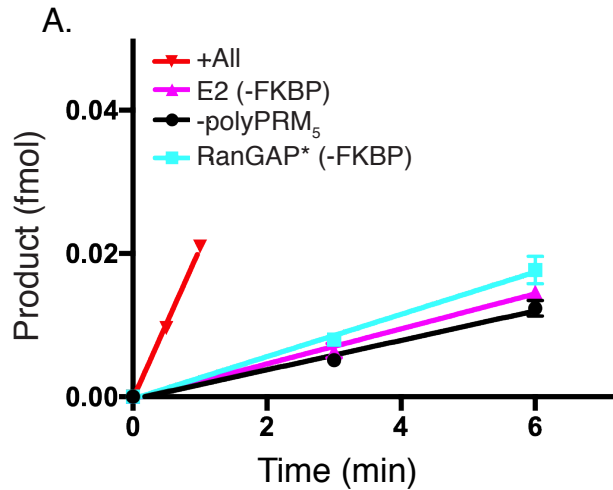

Figure S5

**Supplementary Figure 5. Bulk scaffold enhancement requires both scaffolds to be present and both E2 and substrate to be tethered.**

(A) RanGAP\* SUMOylation over time at sub-critical concentrations of FRB-polySH3<sub>3</sub>:polyPRM<sub>5</sub> without polyPRM<sub>5</sub> (-polyPRM<sub>5</sub>, black circles), with substrate not tethered (Substrate (-FKBP), cyan squares), with E2 not tethered (E2 (-FKBP), magenta triangles), and with all components present and tethered (+All, red inverted triangles). Error bars represent the SEM of 3 independent experiments. For points with no error bars, the errors are too small to depict.

Figure has associated raw data.

A.

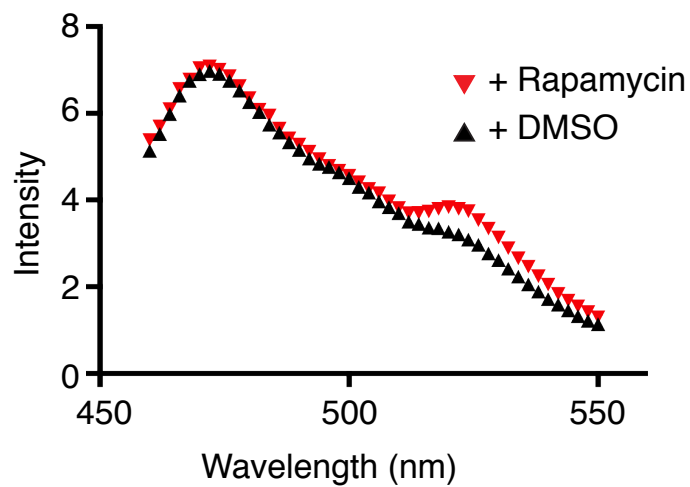

Figure S6

**Supplementary Figure 6. FRET increase requires rapamycin.**

(A) Fluorescence emission spectrum of FKBP-YPet-RanGAP\* upon 445 nm excitation of CyPet-FKBP-E2. Spectra recorded in the presence of FRB-polySH<sub>3</sub> + polyPRM<sub>5</sub> with either Rapamycin (inverted red triangles) or DMSO (black triangles).

Figure has associated raw data.

A.

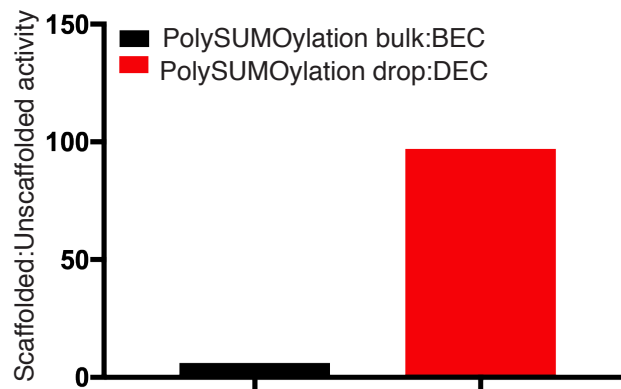

Figure S7

**Supplementary Figure 7. PolySUMOylation acceleration is higher in droplets than in the bulk, suggesting effects beyond  $K_M$  and concentration**

Scaffolded:un scaffolded reaction rate ratio of the polySUMOylation reaction for both bulk and droplet. Scaffolded reactions contain FRB-polySH<sub>3</sub>:polyPRM<sub>5</sub>. Reactions are carried out at identical total enzyme and substrate concentrations of 90nM E1, 200nM E2, and 1uM RanGAP\*. PolySUMOylation rates represent the mean of two independent experiments and only consider the di- and tri-SUMOylated species.

Figure has associated raw data.

A.

|                          |   |   |   |   |   |   |   |   |   |   |   |   |
|--------------------------|---|---|---|---|---|---|---|---|---|---|---|---|
| FRB-polySH3 <sub>3</sub> | + |   | - |   | + |   | + |   | - |   | + |   |
| polyPRM <sub>5</sub>     | - |   | + |   | + |   | - |   | + |   | + |   |
| Rapamycin                | - | + | - | + | - | + | - | + | - | + | - | + |
| Time (min)               | 0 |   |   |   |   |   | 5 |   |   |   |   |   |

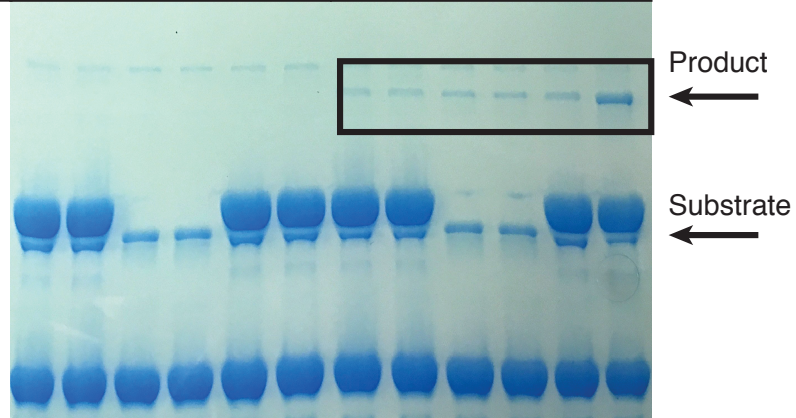

Full gel

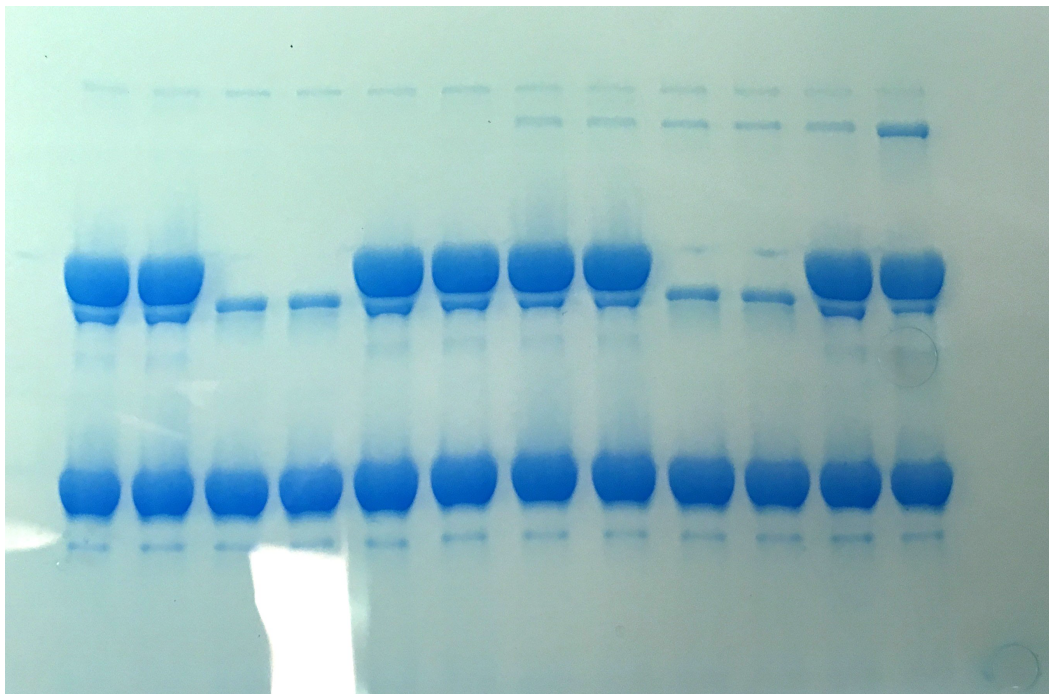

Supplementary Figure 8. Source Data for Supplementary Figure 2.

A) Supplementary Figure 2 alongside the uncropped gel.

Supplementary Table 1. Kinetic parameters of SUMOylation reactions.

| Substrate   | SH3 Scaffold         | $K_M$ ( $\mu\text{M}$ ) | $V_{\text{max}}$ (fmol/min/ $\mu\text{l}$ ) | Hill Coefficient | $K_i$ ( $\mu\text{M}$ ) |
|-------------|----------------------|-------------------------|---------------------------------------------|------------------|-------------------------|
| PML peptide | -                    | $83 \pm 26$             | $3 \pm 0.4$                                 | -                | -                       |
| RanGAP      | -                    | $2.5 \pm 2$             | $14 \pm 10$                                 | -                | $10 \pm 18$             |
| RanGAP*     | -                    | $150 \pm 70$            | $5 \pm 1.5$                                 | $1.4 \pm 0.3$    | -                       |
| RanGAP*     | polySH3 <sub>3</sub> | $50 \pm 15$             | $3.7 \pm 2$                                 | $0.7 \pm 0.1$    | -                       |
| RanGAP*     | polySH3 <sub>5</sub> | $93 \pm 45$             | $4.7 \pm 1.7$                               | $1.8 \pm 0.7$    | -                       |

Supplementary Table 1.

Kinetic parameters obtained for the PML peptide, wildtype RanGAP and mutant RanGAP\* substrates in the absence of scaffolds and for RanGAP\* with sub-critical concentrations of FRB-polySH3<sub>3</sub>:polyPRM<sub>5</sub> and FRB-polySH3<sub>5</sub>:polyPRM<sub>5</sub>.

Supplementary Table 2. Protein concentrations in droplets and bulk solution.

| Protein                  | Total Concentration ( $\mu\text{M}$ ) | Droplet Concentration ( $\mu\text{M}$ ) | Bulk Concentration ( $\mu\text{M}$ ) | Partition Coefficient |
|--------------------------|---------------------------------------|-----------------------------------------|--------------------------------------|-----------------------|
| E1                       | 0.09                                  | $0.17 \pm 0.01$                         | $0.09 \pm 0.01$                      | $1.9 \pm 0.2$         |
| E2                       | 0.1                                   | $1.4 \pm 0.1$                           | $0.09 \pm 0.01$                      | $14 \pm 2$            |
| Substrate                | 1.0                                   | $31 \pm 2$                              | $0.65 \pm 0.03$                      | $48 \pm 4$            |
| SUMO1                    | 1.0                                   | $1.0 \pm 0.1$                           | $1.0 \pm 0.1$                        | $1.0 \pm 0.1$         |
| FRB-polySH3 <sub>5</sub> | 15.0                                  | $660 \pm 16$                            | $6.3 \pm 0.3$                        | $105 \pm 6$           |

Supplementary Table 2.

Protein concentration values measured in FRB-polySH3<sub>3</sub>:polyPRM<sub>5</sub> droplets and bulk as well the total input concentrations and the partition coefficient for each component.

Supplementary Table 3. Constructs used in this study. Protein sequences after proteolytic removal of affinity tags are shown.

| Construct                    | Protein sequence                                                                                                                                                                                                                                                                                                                                                                                                                                                                                                                                                                                               | Tag(s)                                                                        |
|------------------------------|----------------------------------------------------------------------------------------------------------------------------------------------------------------------------------------------------------------------------------------------------------------------------------------------------------------------------------------------------------------------------------------------------------------------------------------------------------------------------------------------------------------------------------------------------------------------------------------------------------------|-------------------------------------------------------------------------------|
| polyPRM <sub>5</sub>         | GHMKGGSWGGSKKKKTAPTPPKRSGGSGGSGGSGGSKKKK<br>TAPTPPKRSGGSGGSGGSGGSGGSKKKKTAPTPPKRSGGSGGS<br>GGSGGSKKKKTAPTPPKRSGGSGGSGGSGGSGGSKKKKTAPTP<br>PKRSGGSGSENLYFQ                                                                                                                                                                                                                                                                                                                                                                                                                                                      | N-terminal MBP<br>(maltose binding<br>protein)<br>C-terminal His <sub>6</sub> |
| FRB-<br>polySH3 <sub>3</sub> | GEFMLEMWHEGLEEASRLYFGERNVKGMEVLEPLHAMME<br>RGPQTLKETSFNQAYGRDLMEAQEWCRKYMKSGNVKDLTQ<br>AWDLYYHVFRRISKQVDGGSGGSGGSGGSHMDLNMPAYVK<br>FNYMAEREDELSLIKGTKVIVMEKSSDGWWRGSYNGQVGV<br>FPSNYVTEEGDSPLASGAGGSEGGGSEGGTSGATDLNMPA<br>YVKFNMAEREDELSLIKGTKVIVMEKSSDGWWRGSYNGQ<br>VGWFPNSNYVTEEGDSPLASGAGGSEGGGSEGGTSGATDLN<br>MPAYVKFNMAEREDELSLIKGTKVIVMEKSSDGWWRGSY<br>NGQVGVFPSNYVTEEGDSPLGGGSENLYFQ                                                                                                                                                                                                                   | N-terminal MBP<br>C-terminal His <sub>6</sub>                                 |
| FRB-<br>polySH3 <sub>5</sub> | GEFMLEMWHEGLEEASRLYFGERNVKGMEVLEPLHAMME<br>RGPQTLKETSFNQAYGRDLMEAQEWCRKYMKSGNVKDLTQ<br>AWDLYYHVFRRISKQVDGGSGGSGGSGGSKDAQTNSSSNN<br>NNNNNNNLGIEGRISHMDLNMPAYVKFNMAEREDELSL<br>IKGTKVIVMEKSSDGWWRGSYNGQVGVFPSNYVTEEGDSP<br>LASGAGGSEGGGSEGGTSGATDLNMPAYVKFNMAEREDE<br>LSLIKGTKVIVMEKSSDGWWRGSYNGQVGVFPSNYVTEEG<br>DSPLASGAGGSEGGGSEGGTSGATHMDLNMPAYVKFNMA<br>EREDELSLIKGTKVIVMEKSSDGWWRGSYNGQVGVFPSNY<br>VTEEGDSPLASGAGGSEGGGSEGGTSGATDLNMPAYVKFN<br>YMAEREDELSLIKGTKVIVMEKSSDGWWRGSYNGQVGVF<br>SNYVTEEGDSPLASGAGGSEGGGSEGGTSGATDLNMPAYV<br>KFNMAEREDELSLIKGTKVIVMEKSSDGWWRGSYNGQVG<br>WFPSNYVTEEGDSPLGGGSENLYFQ | N-terminal MBP<br>C-terminal His <sub>6</sub>                                 |
| ShadowG-<br>SUMO1            | GEFVSKGEELFTGVVPILEVELDGDVNGHKFSVSGEGEGDA<br>TYGKLTLLKLICTTGKLPVPWPTLVTTFGYGLMCFARYPDH<br>MKQHDFFKSAMPEGYVQERTIFFKDDGNYKTRAEVKFEED<br>TLVNRIELKGIIDFKEDGNILGHKLEYNWNShNVYIMADKQ<br>KNGIKVNFKIRHNIEDGSVQLADHYQQNTPIGDGPVLLPD<br>NHYLSTQSKLSKDPNEKRDHMLLEFVTAAGITLGMDELY<br>KSGLRRAQASNSAVDGTMSDQEAKPSTEDLGDKKEGEYI<br>KLKVIQDSSEIHFVKMTTHLKKLKECYCQRQGVPMNSL<br>RFLFEGQRIADNHTPKELGMEEDVIEVYQEQTGG                                                                                                                                                                                                              | N-terminal His <sub>8</sub>                                                   |
| SAE1                         | GEFGGSGGSGGSGGSMVEKEEAGGGISEEEAAQYDRQIRL<br>WGLEAQKRLRASRVLLVGLKGLGAEIAKNLILAGVKGLTM<br>LDHEQVTPEDPGAQFLIRTGSVGRNRAEASLERAQNLNPM<br>VDVKVDTEIDIEKKPESFFTFQFQDAVCLTCCSRDVIKVDQI<br>CHKNSIKFFTGDVFGYHGYTFANLGEHEFVEEKTAKVVS<br>QGVEDGPGPDTKRAKLDSSSETTMVKKKVVFCPVKEALEVD<br>WSSEKAKAALKRTTSDYFLLQVLLKFRDVKGRDPSSDTYE<br>EDSELLLQIRNDVLDLGLISPDLLPEDFVRYCFSEMAPVC<br>AVVGGILAQEIWKALSQRDPPHNNFFFDGMKNGIVECL<br>GPK                                                                                                                                                                                                | N-terminal His <sub>6</sub>                                                   |
| SAE2-<br>mGarnet             | GEFSGGSGGSGGSMALSRGLPRELAEAVAGGRVLLVVGAGG<br>IGCELLKNLVLTFGSHIDLIDLDTIDVSNLNRQFLFQKKH                                                                                                                                                                                                                                                                                                                                                                                                                                                                                                                          | N-terminal-MBP                                                                |



|                     |                                                                                                                                                                                                                                                                                                                                                                                                                                                                                                                                                                                                                                                                                                                                                                                                                                                                                                                          |                                                                                            |
|---------------------|--------------------------------------------------------------------------------------------------------------------------------------------------------------------------------------------------------------------------------------------------------------------------------------------------------------------------------------------------------------------------------------------------------------------------------------------------------------------------------------------------------------------------------------------------------------------------------------------------------------------------------------------------------------------------------------------------------------------------------------------------------------------------------------------------------------------------------------------------------------------------------------------------------------------------|--------------------------------------------------------------------------------------------|
|                     | VGRSKAQVAKESVLFQFYPKANIVAYHDSIMNPDYNVEFFR<br>QFILVMNALDNRAARNHVNRMCLAADVPLIESGTAGYLGQ<br>VTTIKKGVTECYECHKPTQRTFPGCTIRNTPSEPIHCIV<br>WAKYLFNQLFGUEDADQEVSPDRADPEAAWEPTEAEARAR<br>ASNEGDGIKRISTKEWAKSTGYDPVKLFTKLFKDDIRYLL<br>TMDKLWRKRKPPVPLDWAEVQSQGEETNASDQQNEPQLGL<br>KDQQVLDVKSYPARLFSKSIETLRVHLAEKGDGAELIWDKD<br>DPSAMDFVTSANLRMHIFSMNMKSRFDIKSMAGNIIPAI<br>ATTNAVIAGLIVLEGLKILSGKIDQCRTIFLNKQPNPRKK<br>LLVPCALDPPNPNKYVCASKPEVTVRLNVHKVTVLTLQDK<br>IVKEKFAMVAPDVQIEDGKGTILISSEEGETEANNHKKLS<br>EFGIRNGSRLQADDFLQDYTLINILHSEDLGKDVEFEVV<br>GDAPEKVGPKQAEDAASITNGSDDGAQPSTSTAQEQQDDV<br>LIVDSDEEDSSNADVSEERSRKRKLDEKENLSAKRSRI<br>EQKEELDDVIALDLDLRSRAQASNSAVDGTNSLIKENMRM<br>KVVLEGSVNGHQFKCTGEGEGNPYMGQTMRIVKIEGGPL<br>PFAFDILATSFMYGSKTFIKYKPGIPDFFKQSFPEGFTWE<br>RVTRYEDGGVITVMQDTSLEDGCLVYHAQVRGVNFPNGA<br>VMQKKTGWEPNTEMMYPADGGLRGYNHMALKVDGGGHL<br>CSLVTTYSKKTVGNIKMPGIHAVDRRLERLEESDNEMFV<br>VQREHAVAKFAGLGGG |                                                                                            |
| mCherry-<br>E2      | GEFVSKGEEDNMAIIKEFMRFKVMHEGSVNGHEFEIEGEG<br>EGRPYEGTQTAKLKVTKGGPLPFAWDILSPQFMYGSKAYV<br>KHPADIPDYLLKLSFPEGFKWERVMNFEDGGVVTVTQDSSL<br>QDGEFIYKVKLRGTNFPDGPVMQKKTMGWEASSERMYPE<br>DGALKGEIKQRLKLDGGHYDAEVKTTYKAKKPVQLPGAY<br>NVNIKLDITSHNEDCTIVEQYERAEGRHSTGGMDELYKSG<br>GGSGSGSGSGSGMSGIALSRLAQERKAWRKDHPFGFVAVP<br>TKNPDGTMNLMNWECAIPGKKGTPWEGGLFKIRMLFKDDY<br>PSSPPKCKFEPPLFHPNVYPSGTVCLSILEEDKDWRPAIT<br>IKQILLGIQELLNEPNIQDPAQAEAYTIYCQNRVEYEKRV<br>RAQAKKFAPSLEENLYFQ                                                                                                                                                                                                                                                                                                                                                                                                                                                | N-terminal His <sub>10</sub><br>C-terminal RK5<br>(5 repeats of<br>arginine and<br>lysine) |
| mCherry-<br>FKBP-E2 | GEFVSKGEEDNMAIIKEFMRFKVMHEGSVNGHEFEIEGEG<br>EGRPYEGTQTAKLKVTKGGPLPFAWDILSPQFMYGSKAYV<br>KHPADIPDYLLKLSFPEGFKWERVMNFEDGGVVTVTQDSSL<br>QDGEFIYKVKLRGTNFPDGPVMQKKTMGWEASSERMYPE<br>DGALKGEIKQRLKLDGGHYDAEVKTTYKAKKPVQLPGAY<br>NVNIKLDITSHNEDCTIVEQYERAEGRHSTGGMDELYKQL<br>MGVQVETISPGDGRTPFKRGQTCVVHYTGMLLEDGKKFDSS<br>RDRNKPFKFMGLKQEVIRGWEEGVAQMSVQRAKLTISPD<br>YAYGATGHPGIIPPHATLVFDVELLKLNEGGSGSGSGSGG<br>SLRSRAQASNSAVDGTMSGIALSRLAQERKAWRKDHPFGF<br>VAVPTKNPDGTMNLMNWECAIPGKKGTPWEGGLFKLRMLF<br>KDDYPSSPPKCKFEPPLFHPNVYPSGTVCLSILEEDKDWR<br>PAITIKQILLGIQELLNEPNIQDPAQAEAYTIYCQNRVEY<br>EKRVRAQAKKFAPSLENLYFQ                                                                                                                                                                                                                                                                                                         | N-terminal His <sub>10</sub><br>C-terminal RK5                                             |
| CyPet-<br>FKBP-E2   | GEFVSKGEELFGGIVPILVELEGDVNGHKFSVSGEGEGDA<br>TYGKLTLLKFICTTGKLPVPWPTLVTTLTWGVQCFSRYPDH<br>MKQHDFFKSVMPEGYVQERTIFFKDDGNYKTRAEVKFEED<br>TLVNRIELKGIIDFKEDGNILGHKLEYNYISHNVYITADKQ<br>KNGIKANFKARHNITDGSVQLADHYQQNTPIGDGPVILPD<br>NHYLSTQSALS KDPNEKRDHMLLEFVTAAGITHGMDELY<br>KQLMGVQVETISPGDGRTPFKRGQTCVVHYTGMLLEDGKKF                                                                                                                                                                                                                                                                                                                                                                                                                                                                                                                                                                                                      | N-terminal His <sub>10</sub><br>C-terminal RK5                                             |

|                           |                                                                                                                                                                                                                                                                                                                                                                                                                                                                                                                                                                                                                                                                    |                                                                          |
|---------------------------|--------------------------------------------------------------------------------------------------------------------------------------------------------------------------------------------------------------------------------------------------------------------------------------------------------------------------------------------------------------------------------------------------------------------------------------------------------------------------------------------------------------------------------------------------------------------------------------------------------------------------------------------------------------------|--------------------------------------------------------------------------|
|                           | DSSDRNKPFK FMLGKQEVIRGWEEGVAQMSVGRKAKLTI<br>SPDYAYGATGHPGII PPHATLVFDV ELLKLN EGGSGGSGG<br>SGGSLRSRAQASNSAVDGTMSGIALSRLAQERKAWRKDHP<br>FGFVAVPTKNPDGTMNLMNWECAIPGKKGTPWEGGLFKLR<br>MLFKDDYPSPPKCKFEPPLFHPNVYPSGTVCLSILEEDK<br>DWRPAITIKQILLGIQELLNEPNIQDPAQAEAYTIYCQNR<br>VEYEKRVRAQAKKFAPSL ENLYFQ                                                                                                                                                                                                                                                                                                                                                                |                                                                          |
| FKBP-<br>EGFP-<br>RanGAP  | GEFMGVQVETISPGDGRTFPKRGQTCVVHYTG MLEDGKKF<br>DSSDRNKPFK FMLGKQEVIRGWEEGVAQMSVGRKAKLTI<br>SPDYAYGATGHPGII PPHATLVFDV ELLKLN EGGSGGSGG<br>SGGSVSKGEELFTGVVPI LVELDGDVNGHKFSVSGEGEGD<br>ATYGKLT LKFICTTGKLPVPWPTLVTTLT YGVQCFSRYPD<br>HMKQHDFFKSAMPEGYVQERTIFFKDDGNYKTRAEVKFEG<br>DTLVNRIELKGIDFKEDGNILGHKLEYNYNSHNVYIMADK<br>QKNGIKVNFKIRHNI EDG SVQLADHYQONTPI GDGPVLLP<br>DNHYLSTQSKLSKDPNEKRDH MVLLEFVTAAGITLGMDEL<br>YKSGLRSPQQRGQGEKSATPSRKILD PNTGEPAPVLS SPP<br>PADVSTFLAFPSPEKLLRLGPKSSVLIAQQTDTSDPEKVV<br>SAFLKVSSVFKDEATVRMAVQDAVDALMQAFNSSSFNSN<br>TFLTRLLVHMGLLKS EDKVKA IANLYGPLMALNHMVQODY<br>FPKALAPLLLA FVTKPNSALESCSFARHSL LQTL SKVGSE<br>NLYFQ     | N-terminal MBP<br>C-terminal His <sub>6</sub>                            |
| FKBP-<br>EGFP-<br>RanGAP* | GEFMGVQVETISPGDGRTFPKRGQTCVVHYTG MLEDGKKF<br>DSSDRNKPFK FMLGKQEVIRGWEEGVAQMSVGRKAKLTI<br>SPDYAYGATGHPGII PPHATLVFDV ELLKLN EGGSGGSGG<br>SGGSVSKGEELFTGVVPI LVELDGDVNGHKFSVSGEGEGD<br>ATYGKLT LKFICTTGKLPVPWPTLVTTLT YGVQCFSRYPD<br>HMKQHDFFKSAMPEGYVQERTIFFKDDGNYKTRAEVKFEG<br>DTLVNRIELKGIDFKEDGNILGHKLEYNYNSHNVYIMADK<br>QKNGIKVNFKIRHNI EDG SVQLADHYQONTPI GDGPVLLP<br>DNHYLSTQSKLSKDPNEKRDH MVLLEFVTAAGITLGMDEL<br>YKSGLRSPQQRGQGEKSATPSRKILD PNTGEPAPVLS SPP<br>PADVSTFLAFPSPEKLLRLGPKSSVLIAQQTDTSDPEKVV<br>SAFLKVSSVFKDEATVRMAVQDAVDALMQAFNSSSFNSN<br>TFLTRLLVHMGLLKS EDKVKA IANLYGPLMALNHMVQODY<br>FPKALAPLLLA AVTKPNSALESCSFARHSL LQTL SKVGSE<br>NLYFQ     | N-terminal MBP<br>C-terminal His <sub>6</sub><br>Mutation site<br>in red |
| FKBP-<br>YPet-<br>RanGAP* | GEFMGVQVETISPGDGRTFPKRGQTCVVHYTG MLEDGKKF<br>DSSDRNKPFK FMLGKQEVIRGWEEGVAQMSVGRKAKLTI<br>SPDYAYGATGHPGII PPHATLVFDV ELLKLN EGGSGGSGG<br>SGGSVSKGEELFTGVVPI LVELDGDVNGHKFSVSGEGEGD<br>ATYGKLT LKLLCTTGKLPVPWPTLVTTLT YGYGVQC FARYPD<br>HMKQHDFFKSAMPEGYVQERTIFFKDDGNYKTRAEVKFEG<br>DTLVNRIELKGIDFKEDGNILGHKLEYNYNSHNVYITADK<br>QKNGIKANFKIRHNI EDG G VQLADHYQONTPI GDGPVLLP<br>DNHYLSYQSALFKDPNEKRDH MVLLEFLTAAGITEGMNEL<br>YKSGLRSPQQRGQGEKSATPSRKILD PNTGEPAPVLS SPP<br>PADVSTFLAFPSPEKLLRLGPKSSVLIAQQTDTSDPEKVV<br>SAFLKVSSVFKDEATVRMAVQDAVDALMQAFNSSSFNSN<br>TFLTRLLVHMGLLKS EDKVKA IANLYGPLMALNHMVQODY<br>FPKALAPLLLA AVTKPNSALESCSFARHSL LQTL SKVGSE<br>NLYFQ | N-terminal MBP<br>C-terminal His <sub>6</sub><br>Mutation site<br>in red |
| FKBP-                     | GEFMGVQVETISPGDGRTFPKRGQTCVVHYTG MLEDGKKF                                                                                                                                                                                                                                                                                                                                                                                                                                                                                                                                                                                                                          | N-terminal MBP                                                           |

|                  |                                                                                                                                                                                                                                                                                                                                                                                                                                                                                                                                                                                |                                                                          |
|------------------|--------------------------------------------------------------------------------------------------------------------------------------------------------------------------------------------------------------------------------------------------------------------------------------------------------------------------------------------------------------------------------------------------------------------------------------------------------------------------------------------------------------------------------------------------------------------------------|--------------------------------------------------------------------------|
| EGFP-PML peptide | DSSDRNKPFK FMLGKQEVIRGWEEGVAQMSVGRAKLTI<br>SPDYAYGATGHPGIIPPHATLVFDVELLKLNEGSGSGSGG<br>SGGSVSKGEELFTGVVPILVELDGDVNGHKFSVSGEGEGD<br>ATYKLTLLKFICTTGKLPVPWPTLVTTLTLYGVQCFSRYPD<br>HMKQHDFFKSAMPEGYVQERTIFFKDDGNYKTRAEVKFEG<br>DTLVNRIELKGIDFKEDGNILGHKLEYNYNSHNVYIMADK<br>QKNGIKVNFKIRHNIEDGSVQLADHYQQNTPIGDGPVLLP<br>DNHYLSTQSKLSKDPNEKRDHMLLEFVTAAGITLGMDEL<br>YKGGSGSGSGSKVDVIDLTISSSDEEEDPPAKRGSAGSA<br>GSAGSAGSAGSAGSAGSAGSAGSAGSAGSAGSAGSASQTQSPRKVI<br>KMESEEGSENLYFQ                                                                                                     | C-terminal His <sub>6</sub>                                              |
| EGFP-PML peptide | GEFVSKGEELFTGVVPILVELDGDVNGHKFSVSGEGEGDA<br>TYGKLTLLKFICTTGKLPVPWPTLVTTLTLYGVQCFSRYPDH<br>MKQHDFFKSAMPEGYVQERTIFFKDDGNYKTRAEVKFEGD<br>TLVNRIELKGIDFKEDGNILGHKLEYNYNSHNVYIMADKQ<br>KNGIKVNFKIRHNIEDGSVQLADHYQQNTPIGDGPVLLPD<br>NHYLSTQSKLSKDPNEKRDHMLLEFVTAAGITLGMDELY<br>KGGSGSGSGSKVDVIDLTISSSDEEEDPPAKRGSAGSAG<br>SAGSAGSAGSAGSAGSAGSAGSAGSAGSAGSAGSASQTQSPRKVIK<br>MESEEGSENLYFQ                                                                                                                                                                                            | N-terminal MBP<br>C-terminal His <sub>6</sub>                            |
| EGFP-RanGAP*     | GEFVSKGEELFTGVVPILVELDGDVNGHKFSVSGEGEGDA<br>TYGKLTLLKFICTTGKLPVPWPTLVTTLTLYGVQCFSRYPDH<br>MKQHDFFKSAMPEGYVQERTIFFKDDGNYKTRAEVKFEGD<br>TLVNRIELKGIDFKEDGNILGHKLEYNYNSHNVYIMADKQ<br>KNGIKVNFKIRHNIEDGSVQLADHYQQNTPIGDGPVLLPD<br>NHYLSTQSKLSKDPNEKRDHMLLEFVTAAGITLGMDELY<br>KSGLRSPQQRGQGEKSATPSRKILDPNTGEPAPVLSSPPP<br>ADVSTFLAFPSPEKLLRLGPKSSVLI AQQTDTSDPEKVVS<br>AFLKVSSVFKDEATVRMAVQDAVDALMQKAFNSSSFSNSNT<br>FLTRLLVHMGLLKSEDKVKAIANLYGPLMALNHMVQDYF<br>PKALAPLLLA <sup>A</sup> VTKPN <sup>A</sup> SALESCSFARHSL <sup>L</sup> LQTL <sup>L</sup> SKV <sup>S</sup> SEN<br>LYFQ | N-terminal MBP<br>C-terminal His <sub>6</sub><br>Mutation site<br>in red |

## Supplementary Methods: Modeling

All modeling was performed in MATLAB (Mathworks). Models were generated using the Michaelis-Menten (MM) equation to describe reaction rates in the droplet and bulk compartments,  $R = k_{cat}[E][S]/K_M + [S]$ , where  $[E]$  and  $[S]$  are the concentrations of enzyme and substrate in the respective compartment and  $K_M$  can either be the scaffolded ( $K_{M,S}$ ) or unscaffolded ( $K_{M,US}$ ) value. The model assumed identical  $k_{cat}$  in both compartments. The droplet and bulk concentrations are related to the total concentration according to:  $V_T \cdot C_T = V_D \cdot C_D + V_B \cdot C_B$ , where  $C$  is concentration,  $V$  is volume,  $T$  is total,  $D$  is droplet, and  $B$  is bulk. By setting  $V_T = 1$ , defining the partition coefficient ( $PC$ ) =  $C_D/C_B$  (assumed, for simplicity, to be identical for  $E$  and  $S$ ), and assigning a value to the compartment (droplet or bulk) volume fraction, this equation can be rearranged to express  $C_D$  or  $C_B$  as a function of  $C_T$  and  $PC$ , which can be substituted into the MM equation to yield the enzymatic rate in a given compartment.

When  $E$  and  $S$  are recruited into droplets, the droplet and bulk rates can be expressed as:

$$R_D = \frac{k_{cat}[E]_D[S]_D}{K_{M,S} + [S]_D} \quad (1)$$

and:

$$R_B = \frac{k_{cat}[E]_B[S]_B}{K_{M,S} + [S]_B} \quad (2)$$

Rearranging  $C_T \cdot V_T = V_D \cdot C_D + V_B \cdot C_B$ , and assuming a 1% droplet volume gives:

$$C_D = \frac{100C_T * PC}{PC + 99} \quad (3)$$

and

$$C_B = \frac{100[E]t}{99 + PC} \quad (4)$$

Substituting equations (3) and (4) into equations (1) and (2), respectively, gives droplet and bulk rates of:

$$R_D = k_{cat}[E]_D \frac{100[S]_T * PC}{K_{M,S}(PC + 99) + 100[S]_T * PC} \quad (5)$$

and:

$$R_B = \frac{k_{cat}[E]_D}{PC} * \frac{100[S]_T}{K_{M,S}(PC + 99) + 100[S]_T} \quad (6)$$

For a droplet volume of 1%, the total scaffolded reaction rate,  $R_{T,S} = 0.01R_D + 0.99 R_B$ :

$$R_{T,S} = k_{cat}[E]_D \left\{ \frac{[S]_T * PC}{K_{M,S}(PC + 99) + 100[S]_T * PC} + \frac{1}{PC} \right. \quad (7)$$

$$\left. * \frac{99[S]_T}{K_{M,S}(PC + 99) + 100[S]_T} \right\}$$

The total unscaffolded reaction rate is:

$$R_{T,US} = \frac{k_{cat}[E]_T[S]_T}{K_{M,US} + [S]_T} \quad (8)$$

Or

$$R_{T,US} = k_{cat}[E]_D * \frac{(PC + 99)}{100PC} * \frac{[S]_T}{K_{M,US} + [S]_T}$$

Thus, the ratio of total scaffolded to total unscaffolded rates,  $R_{T,S}/R_{T,US}$  is:

$$\frac{R_{T,S}}{R_{T,US}} = \frac{100PC}{PC + 99} \quad (9)$$

$$* \left\{ \frac{PC * (K_{M,US} + [S]_T)}{K_{M,S}(PC + 99) + 100[S]_T * PC} + \frac{1}{PC} \right.$$

$$* \left. \frac{99(K_{M,US} + [S]_T)}{K_{M,S}(PC + 99) + 100[S]_T} \right\}$$

The ratio of droplet to bulk rates is given by dividing equation (5) by equation (6):

$$\frac{R_D}{R_B} = \frac{PC^2 (K_{M,S}(PC + 99) + 100[S]_T)}{K_{M,S}(PC + 99) + 100[S]_T * PC} \quad (10)$$

This is the ratio of rates per volume, which can be converted to the ratio of total activities by dividing by 99.

MATLAB code for the modeling figures are as follows:

Extended Data Figure 1A:

```
[X,Y] = meshgrid(0.1:10,1:100);
```

```
Z=((100.*Y)./(99+Y)).*(((Y.*(10+10.*X))./(((10/3).*(Y+99))+1000.*Y.*X)))+((1./Y).*((99.*(10+10.*X))./(((10/3).*(Y+99))+1000.*X))));
```

```
surf(X,Y,Z);
```

```
xlabel('[substrate]/Km')
```

```
ylabel('partition coefficient')
```

```
zlabel('total S/ total US rate')
```

Extended Data Figure 1A inset:

```
x = 0.1:10;
```



```

y=(5000./149).*(((50.*(10+10.*x))./(((10/3).*(50+99))+1000.*50.*x))+((1./50).*((99.*(10+10.*x))./
(((10/3).*(50+99))+1000.*x))));
plot(x,y)

```

Extended Data Figure 1B:

```

[X,Y] = meshgrid(1:100,1:100);
Z=(7700./(((1+(99./Y)).^2).*((70./X)+(700./((1+(99./Y)))))))+(762300./(((99+Y).^2).*((70./X)+(700.
/(99+Y))));
surf(X,Y,Z);
xlabel('Kmus/Kms')
ylabel('partition coefficient')
zlabel('total S/total US rate')

```

Extended Data Figure 1C:

```

[X,Y] = meshgrid(1:100,1:100);
Z=(77000./(((1+(99./Y)).^2).*((70./X)+(70000./((1+(99./Y)))))))+(7623000./(((99+Y).^2).*((70./X)+
(70000./((99+Y))));
surf(X,Y,Z);
xlabel('Kmus/Kms')
ylabel('partition coefficient')
zlabel('total S/total US rate')

```

Extended Data Figure 2A:

```

[X,Y] = meshgrid(1:100,1:100);
Z=((7000+(7000.*X))./(100.*(1+(99./Y)).*(70+((7000.*X)./(1+(99./Y)))))))+(693000+(693000.*X)).
/(100.*(99+Y).*(70+((7000.*X)./(99+Y))));
surf(X,Y,Z);

```

```
xlabel('[substrate]/Km')
```

```
ylabel('partitioning coefficient')
```

```
zlabel('total S/ total US rate')
```

Extended Data Figure 2B:

```
[X,Y] = meshgrid(1:100,1:100);
```

```
Z=((7000+(7000.*X))./(10.9.*(1+(99./Y)).*(70+((7000.*X)./(1+(99./Y)))))))+((693000+(693000.*X))./(109.*(99+Y).*(70+((7000.*X)./(99+Y)))));
```

```
surf(X,Y,Z);
```

```
xlabel('[substrate]/Km')
```

```
ylabel('partitioning coefficient')
```

```
zlabel('total S/ total US rate')
```

Extended Data Figure 2C:

```
[X,Y] = meshgrid(1:100,1:100);
```

```
Z=((7000+(7000.*X))./(1.99.*(1+(99./Y)).*(70+((7000.*X)./(1+(99./Y)))))))+((693000+(693000.*X))./(199.*(99+Y).*(70+((7000.*X)./(99+Y)))));
```

```
surf(X,Y,Z);
```

```
xlabel('[substrate]/Km')
```

```
ylabel('partition coefficient')
```

```
zlabel('total S/ total US rate')
```

Extended Data Figure 3A:

```
[X,Y] = meshgrid(0.1:10,1:100);
```

```
Z = (Y.^2).*(17+((7000.*X)./(99+Y)))./(17+((7000.*X)./(1+(99./Y))));
```

```
surf(X,Y,Z);
```

```
xlabel('[substrate]/Km')
```

```
ylabel('partitioning coefficient')
```

```
zlabel('droplet/bulk rate')
```

Extended Data Figure 3B:

```
[X,Y] = meshgrid(0.1:10,1:100);
```

```
Z=(1./(((1+(99./Y)).^2).*(17+((1700.*X)./(1+(99./Y)))))))/((1./(((1+(99./Y)).^2).*(17+((1700.*X)./(1+(99./Y)))))))+(99./(((Y+99).^2).*(17+((1700.*X)./(99+Y))))));
```

```
surf(X,Y,Z);
```

```
xlabel('[substrate]/Km')
```

```
ylabel('partitioning coefficient')
```

```
zlabel('total fractional droplet rate')
```
